# Supplementary material for: Comparison study of the effect of CeO2-based carrier materials on the total oxidation of CO, methane, and propane over RuO2
Source: Royal Society of Chemistry journal article supplement (doi:10.1039/d1cy01277k), 2021-01-01
Supplement: d1cy01277k1.pdf [file d1cy01277k1.pdf]

## Supporting Information

### Comparing study of the effect of the CeO<sub>2</sub>-based carrier materials on the total oxidation of CO, methane, and propane over RuO<sub>2</sub>

Zheng Wang,<sup>a,b</sup> Omeir Khalid,<sup>b</sup> Wei Wang,<sup>a,b</sup> Yu Wang,<sup>a</sup> Tim Weber,<sup>b</sup> Alexander Spriewald Luciano,<sup>b</sup> Wangcheng Zhan,<sup>a\*</sup> Bernd Smarsly,<sup>b\*</sup> Herbert Over<sup>b\*</sup>

*a) Key Laboratory for Advanced Materials, Research Institute of Industrial Catalysis, School of Chemistry and Molecular Engineering, East China University of Science and Technology, Shanghai 200237, PR China*

*b) Physikalisch-Chemisches Institut, Justus Liebig University, Heinrich-Buff-Ring 17, 35392 Giessen, Germany*

\* Corresponding author: email [Herbert.Over@phys.Chemie.uni-giessen.de](mailto:Herbert.Over@phys.Chemie.uni-giessen.de);  
[Bernd.Smarsly@phys.Chemie.uni-giessen.de](mailto:Bernd.Smarsly@phys.Chemie.uni-giessen.de); [Zhanwc@ecust.edu.cn](mailto:Zhanwc@ecust.edu.cn)

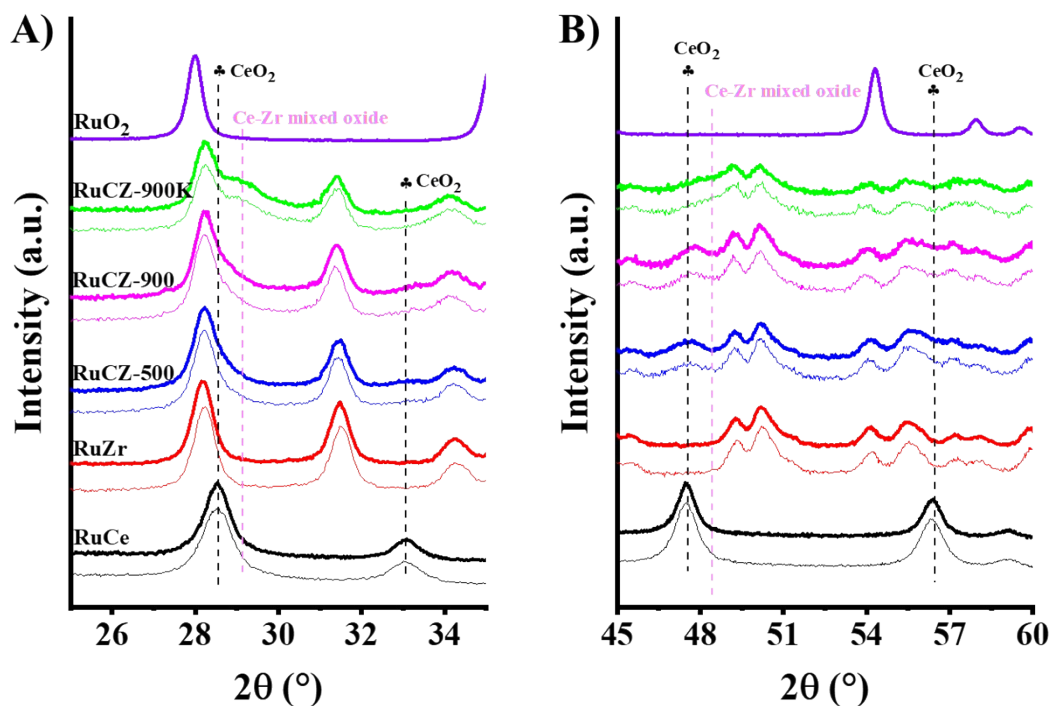

Figure S1: Enlarged XRD patterns of the various  $\text{RuO}_2$ -supported catalysts.

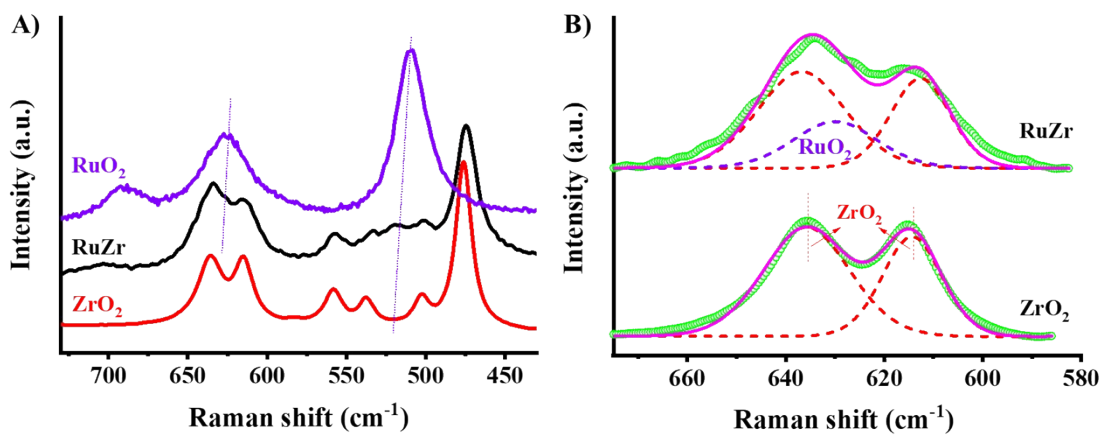

Figure S2: Deconvolution of vibrational Raman modes in the region  $600\text{--}650\text{ cm}^{-1}$  of  $\text{ZrO}_2$  and  $\text{RuZr}$ , revealing a  $\text{RuO}_2$ -related feature.

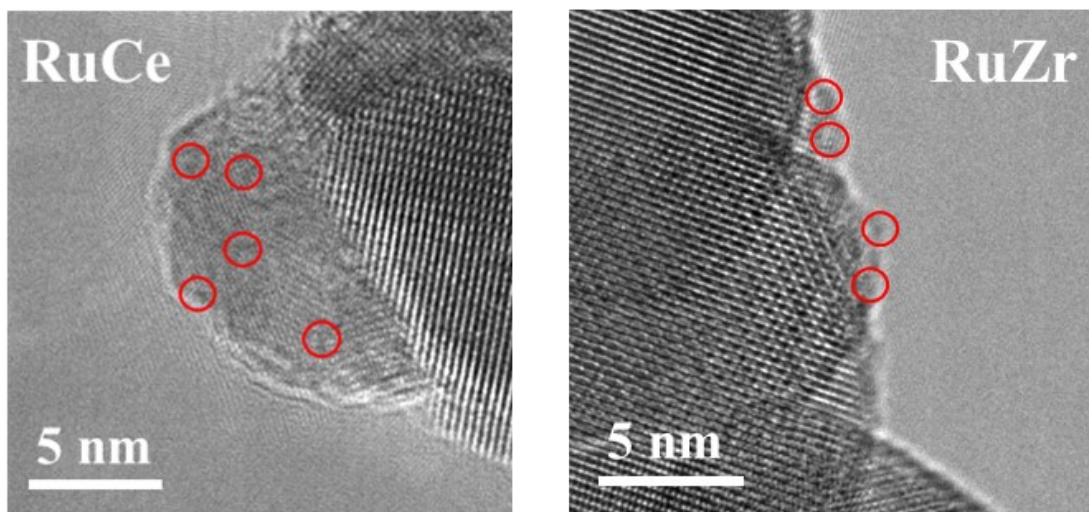

**Figure S3.** STEM images of RuCe (left) and RuZr (right) indicating with red circles the position of possible particles.

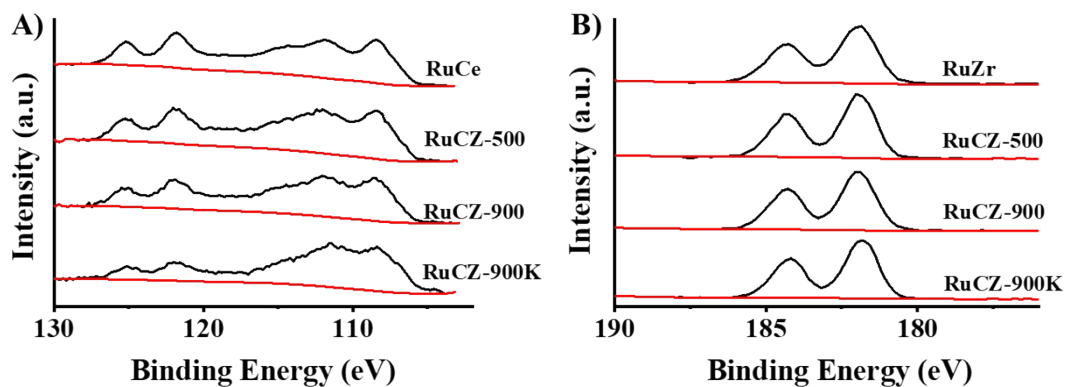

**Figure S4.** Ce 4d (A) and Zr 3d (B) XPS spectra of the various RuO<sub>2</sub>-supported catalysts.

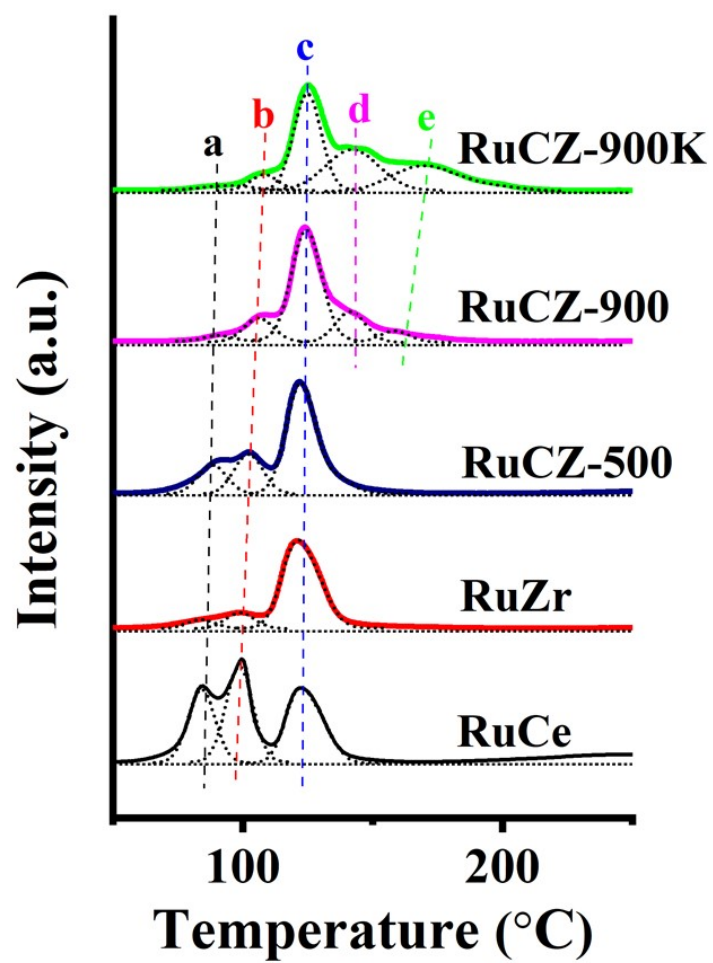

**Figure S5:** Deconvolution of H<sub>2</sub>-TPR in the low temperature region of the various RuO<sub>2</sub>-supported catalysts.

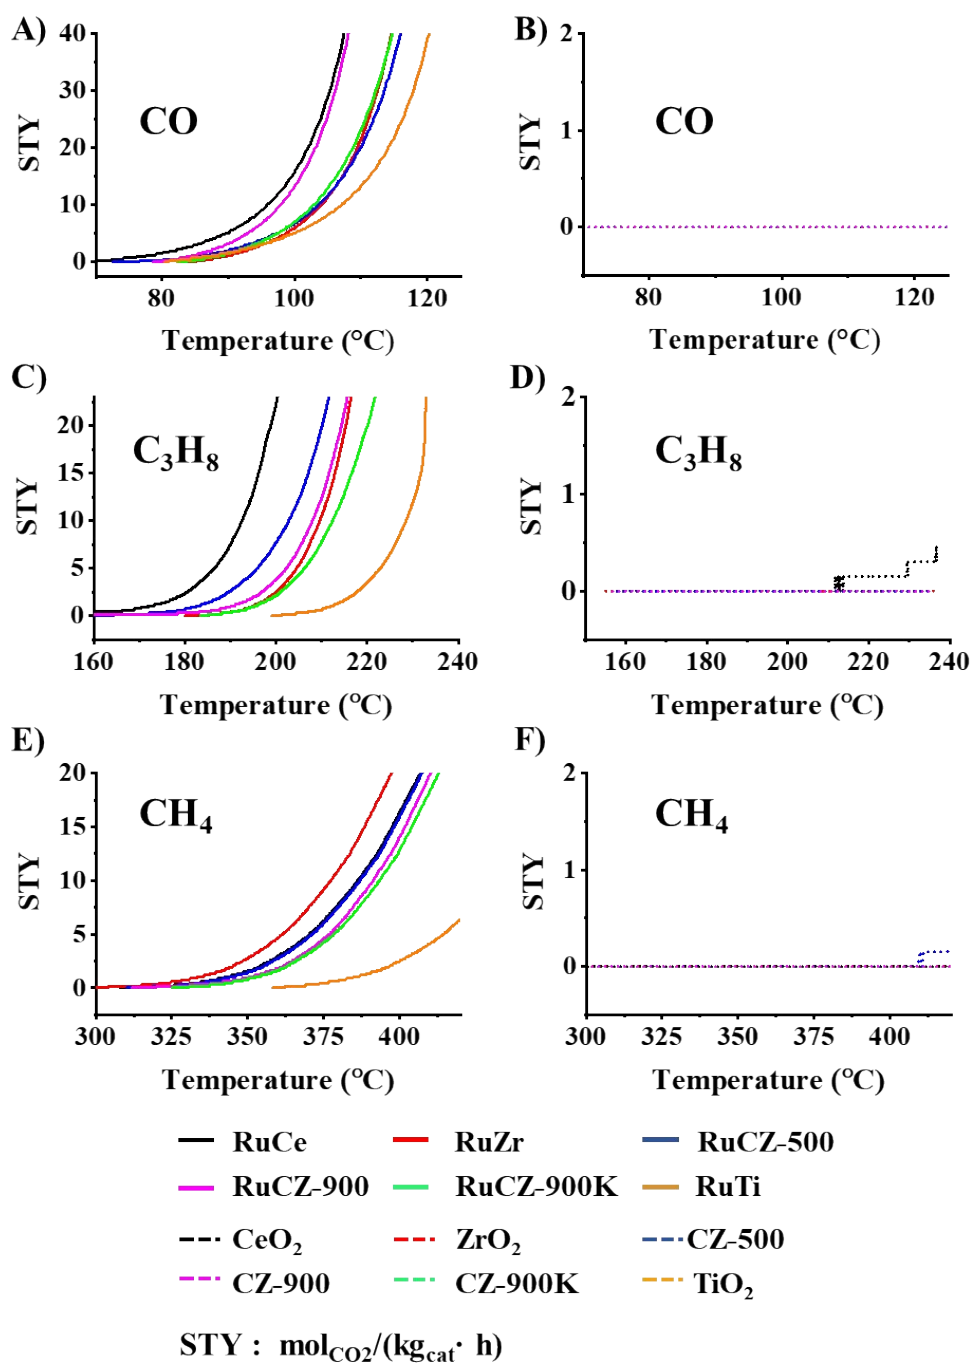

**Figure S6.** STY data as a function of reaction temperature of three different catalytic reactions (CO, propane, methane combustion) over RuO<sub>2</sub> that is supported on various carrier materials (A,C,E) and pure carriers (B,D,F).
